# TMS-EEG signatures of glutamatergic neurotransmission in human cortex

Franca König<sup>1,†</sup>, Paolo Belardinelli<sup>1,†</sup>, Chen Liang<sup>1</sup>, Debora Desideri<sup>1</sup>, Florian Müller-Dahlhaus<sup>1,2</sup>, Pedro Caldana Gordon<sup>1,3</sup>, Carl Zipser<sup>1,4</sup>, Christoph Zrenner<sup>1</sup>, Ulf Ziemann<sup>1,\*</sup>

<sup>1</sup>*Department of Neurology & Stroke, and Hertie Institute for Clinical Brain Research, University of Tübingen, Hoppe-Seyler-Str. 3, 72076 Tübingen, Germany.*

<sup>2</sup>*Department of Psychiatry and Psychotherapy, Johannes Gutenberg University Medical Center Mainz, Germany*

<sup>3</sup>*Service of Interdisciplinary Neuromodulation, Laboratory of Neuroscience (LIM27) and National Institute of Biomarkers in Psychiatry (INBioN), Department and Institute of Psychiatry, Hospital das Clinicas HCFMUSP, Faculdade de Medicina, Universidade de São Paulo, São Paulo, Brazil.*

<sup>4</sup>*University Clinic for Psychiatry and Psychosomatic Medicine, Zürich*

† These authors share first authorship

\* **Corresponding Author:** Prof. Ulf Ziemann, Department of Neurology & Stroke, and Hertie Institute for Clinical Brain Research, University of Tübingen, Hoppe-Seyler-Str. 3, 72076 Tübingen, Germany. Tel. +49 7071 2982049, e-mail: [ulf.ziemann@uni-tuebingen.de](mailto:ulf.ziemann@uni-tuebingen.de)

**Keywords:** Transcranial Magnetic Stimulation; Pharmacology-TMS-EEG; Glutamatergic Drugs; Excitability; Motor Cortex; Electroencephalography.

23 **Abstract**

24 Neuronal activity in the brain is regulated by an excitation-inhibition balance. Glutamate  
25 is the main excitatory neurotransmitter. Transcranial magnetic stimulation (TMS)  
26 evoked electroencephalographic (EEG) potentials (TEPs) represent a novel way to  
27 quantify pharmacological effects on neuronal activity in the human cortex. Here we  
28 tested TEPs under the influence of a single oral dose of two anti-glutamatergic drugs,  
29 perampanel, an AMPA-receptor antagonist, and dextromethorphan, an NMDA-  
30 receptor antagonist, and nimodipine, an L-type voltage-gated calcium channel blocker  
31 in 16 healthy adults in a pseudorandomized, double-blinded, placebo-controlled,  
32 crossover design. Single-pulse TMS was delivered to the left motor cortex and TEPs  
33 were obtained pre- and post-drug intake. Dextromethorphan specifically increased the  
34 amplitude of the N45, a negative potential around 45 ms after the TMS pulse, while  
35 perampanel reduced the P70 amplitude in the non-stimulated hemisphere. Nimodipine  
36 and placebo had no effect on TEPs. These data extend previous pharmaco-TMS-EEG  
37 studies by demonstrating that the N45 is regulated by a balance of GABAergic  
38 inhibition and NMDA-receptor-mediated glutamatergic excitation. In contrast, AMPA-  
39 receptor-mediated glutamatergic neurotransmission contributes to  
40 interhemispherically propagated activity reflected in the P70. These data are important  
41 to understand the physiology of TEPs as markers of excitability and propagated activity  
42 in the human cortex in health and disease.

## 43 **Introduction**

44 Transcranial magnetic stimulation (TMS) evoked electroencephalographic (EEG)  
45 potentials (TEPs) reflect excitability and effective connectivity of the human brain  
46 (Ilmoniemi and Kicic 2010; Rogasch and Fitzgerald 2013; Chung et al. 2015; Tremblay  
47 et al. 2019). However, the exact physiological mechanisms underlying the multiple  
48 TEPs evoked by, e.g., motor cortex stimulation (Bonato et al. 2006; Lioumis et al.  
49 2009) remain still largely elusive. Pharmacology-TMS-EEG has demonstrated that the  
50 N45, a negative potential around 45 ms after the TMS pulse, is regulated by  
51 GABAergic inhibition as its amplitude is enhanced by allosteric positive modulators  
52 at GABA receptors, such as benzodiazepines and zolpidem (Premoli et al. 2014;  
53 Premoli et al. 2018), but reduced by the experimental compound S44819 (Darmani et  
54 al. 2016), a specific antagonist at the alpha-5 subtype of the GABA receptor. In  
55 contrast, GABAergic inhibition contributes to the N100, as its amplitude at the site of  
56 the stimulated motor cortex is increased by baclofen, a specific GABAB receptor  
57 agonist (Premoli et al. 2014; Premoli et al. 2018). The P25 seems to reflect  
58 corticospinal excitability as its amplitude correlates with the amplitude of motor evoked  
59 potentials (MEPs) measured with electromyography (EMG) (Mäki and Ilmoniemi 2010;  
60 Cash et al. 2017), and is suppressed by the voltage-gated sodium channel blocker  
61 carbamazepine (Darmani et al. 2018a). Finally, late TEPs, in particular the P180, are  
62 also suppressed by voltage-gated sodium channel blockers (Premoli et al. 2017;  
63 Darmani et al. 2018a).

64 The excitatory glutamatergic system has so far not been tested with TMS-EEG,  
65 although it plays a fundamental role in the excitation-inhibition balance to regulate  
66 neuronal excitability in cerebral cortex (Tatti et al. 2017). Understanding the role that  
67 glutamatergic neurotransmission plays on TEP generation is essential to obtain an  
68 accurate physiological understanding of the TMS evoked EEG potentials. This is of

69 relevance if TEPs shall be used as diagnostic/prognostic markers in psychiatric or  
70 neurological disorders (Tremblay et al. 2019), many of which show a dysfunction in  
71 the glutamatergic system, e.g., schizophrenia (Hasan et al. 2014), epilepsy (Eid et al.  
72 2008) or amyotrophic lateral sclerosis (Blasco et al. 2014).

73 Here, we investigated the effects of a single oral dose of two anti-glutamatergic drugs  
74 (perampanel, dextromethorphan) and the L-type voltage-gated calcium channel (L-  
75 VGCC) blocker nimodipine (Hess et al. 1984) on TEPs in healthy subjects in a  
76 pseudorandomized double-blind placebo-controlled crossover design. Perampanel is  
77 a selective, non-competitive postsynaptic  $\alpha$ -amino-3-hydroxy-5-methyl-4-isoxazole  
78 propionic acid (AMPA) receptor antagonist (Rogawski and Hanada 2013).  
79 Dextromethorphan is a prodrug whose active metabolite, dextrorphan, acts as a non-  
80 competitive N-methyl-D-aspartate (NMDA) receptor antagonist (Wong et al. 1988).  
81 AMPA and NMDA receptors are the main ionotropic receptors for glutamate in the  
82 central nervous system. AMPA receptor-mediated currents generate fast excitatory  
83 postsynaptic potentials (EPSPs), while NMDA receptor activation provides a prolonged  
84 EPSP that can last several hundred milliseconds. Action potential generation is largely  
85 controlled by AMPA receptor de/activation, while the longer kinetics of NMDA  
86 receptors enable spatial and temporal summation of postsynaptic potentials (Niciu et  
87 al. 2012). Accordingly, perampanel is used as an antiepileptic drug (Faulkner 2017),  
88 while dextromethorphan has demonstrated efficacy in reducing synaptic plasticity in  
89 human cortex (Stefan et al. 2002; Wankerl et al. 2010; Weise et al. 2017). Finally, L-  
90 VGCCs are not significantly involved in controlling the release of glutamate from  
91 presynaptic nerve terminals (Catterall 2011) but block synaptic plasticity in human  
92 cortex (Wolters et al. 2003; Wankerl et al. 2010; Weise et al. 2017), probably through  
93 inhibition of calcium flux into depolarized postsynaptic cells (Igelmund et al. 1996).

94 We had no specific hypotheses as to the effects of these study drugs on TEP  
95 amplitudes, given that pharmaco-TMS-EEG is a nascent field. Therefore, the study is  
96 exploratory, but positive findings would significantly enhance our understanding of the  
97 mechanisms underlying TEPs, since the effects of anti-glutamatergic drugs and VGCC  
98 blockers have not been tested in this context.

## 99 **Material und methods**

### 100 *Participants*

101 Eighteen male participants (mean age  $\pm$  SD: 26.0  $\pm$  3.5 years, range: 22-36 years),  
102 were included in this study. All subjects underwent physical and neurological  
103 examination, and were screened for possible contraindications to TMS (Rossi et al.  
104 2009) and to the study medication. Inclusion criteria were written informed consent,  
105 right-handedness (mean laterality score  $\pm$  SD: 88  $\pm$  15 % according to the Edinburgh  
106 Inventory (Oldfield 1971)) and male gender, to avoid possible effects of the menstrual  
107 cycle on cortical excitability (Smith et al. 1999). Exclusion criteria were: presence or  
108 history of neurologic and psychiatric disease, use of illicit or recreational drugs,  
109 smoking, and a history of low blood pressure (assessed with history of past  
110 measurements or symptoms, e.g. syncope). The study was approved by the Ethics  
111 Committee of the Medical Faculty of Eberhard-Karls-University Tübingen (registration  
112 number 526/2014BO1). Sixteen subjects completed all the experimental sessions.  
113 One participant did not finish the study due to medical conditions unrelated to the study  
114 and one other subject dropped out during the measurements. Therefore, the data  
115 analyses are based on 16 subjects.

### 116 *Experimental design*

117 A combined pharmaco-TMS-EEG approach (Premoli et al. 2014; Darmani et al. 2016)  
118 with a pseudorandomized, placebo-controlled, double-blinded crossover design was  
119 employed to study the acute effects of perampanel, dextromethorphan and nimodipine  
120 on TEP amplitudes.  
121 Each experimental session consisted of one pre- and one post-drug measurement,  
122 which involved the same procedures, as follows. Before each measurement, resting  
123 motor threshold (RMT), defined as the minimum intensity sufficient to elicit an MEP

124 amplitude  $\geq 50 \mu\text{V}$  in at least five out of ten trials was determined, using the relative  
125 frequency method (Groppa et al. 2012). Then, resting-state EEG (3 min eyes open)  
126 was recorded, followed by the delivery of 150 single monophasic TMS pulses with a  
127 random interstimulus interval of  $5 \pm 1$  s for TEP recordings. The TMS target was the  
128 hand area of the left primary motor cortex (M1), a constant coil position was maintained  
129 throughout the experiment. The pre- and post-drug measurements were separated by  
130 the administration of the study drug, immediately after the pre-drug measurements,  
131 and a pause, which allowed the drug to reach peak serum level (see Supplementary  
132 Material and Fig. 1). Due to different pharmacokinetics, drugs and/or placebo were  
133 applied at two different time points to ensure a double-blinded design.

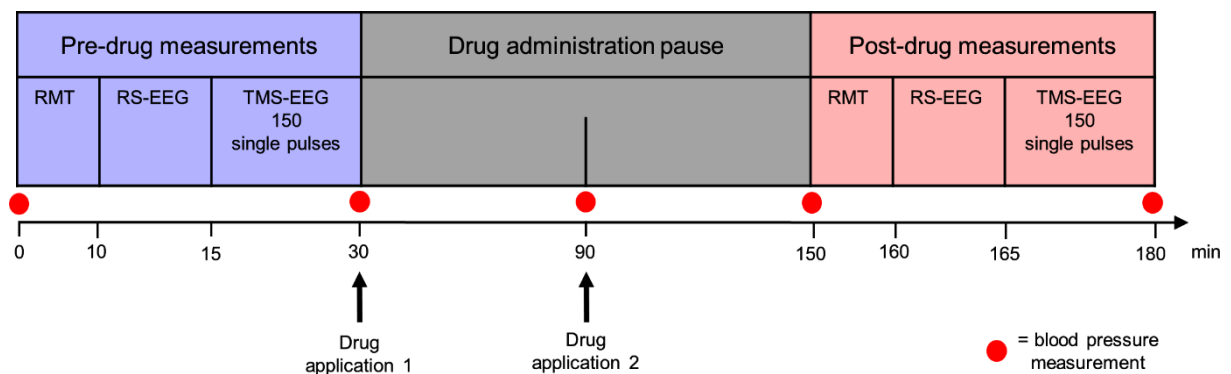

134 **Figure 1. Timeline of experiments.** Determination of resting motor threshold (RMT) at the beginning  
135 of pre- and post-drug measurements was followed by resting-state EEG (RS-EEG) and a block of 150  
136 single TMS pulses over the left primary motor cortex with simultaneous EEG measures (TMS-EEG).  
137 During the two-hour medication pause two drug administrations were performed (see Supplementary  
138 Table 2). One hour after the second drug administration, the post-drug measurements were obtained in  
139 the same sequence as the pre-drug measurements. Blood pressure was monitored throughout the  
140 measurement.  
141

142 Participants received a single oral dose of perampanel (12 mg/6 mg, Fycompa®, Eisai  
143 Pharma), dextromethorphan (120 mg, Hustenstiller-ratiopharm® Dextromethorphan,  
144 ratiopharm GmbH), nimodipine (30 mg, Nimodipin-Hexal®, Hexal AG), or placebo (P-  
145 Tabletten Lichtenstein; Placebo Kapseln). Drug dosages employed in the study are

146 approved for medical use. The order of drugs was pseudorandomized and balanced  
147 across subjects. Based on drug pharmacokinetics reported in the literature the study  
148 drugs are characterized by different peak-plasma times (Supplementary Table 1).  
149 Accordingly, study drugs and placebo were given at the two time points indicated in  
150 Supplementary Table 2. To avoid carry-over drug effects, consecutive sessions in each  
151 participant were separated by at least two weeks.

### 152 *TMS-EEG and EMG data recordings*

153 All participants were seated in a comfortable reclining chair throughout pre- and post-  
154 drug measurements. They were instructed to keep their eyes open and to focus on a  
155 small black cross in front of them to reduce eye movements. Their right hand was  
156 comfortably placed and relaxed throughout the experiment to avoid muscle activation,  
157 as this increases the MEP amplitude (Hess et al. 1987).

158 A TMS-compatible EEG amplifier (BrainAmp DC, BrainProducts GmbH, Munich,  
159 Germany) and 62 high-density TMS-compatible C-ring slit EEG electrodes  
160 (EASYCAP, Germany) arranged in the International 10-20 montage (Dmochowski et  
161 al. 2017) were used to acquire EEG at a sampling rate of 5 kHz. To monitor eye  
162 movement and blinking, two additional electrodes were placed above the right eye  
163 and at its outer canthus. All electrode impedances were maintained at  $< 5 \text{ k}\Omega$   
164 throughout the session. In order to avoid possible EEG contamination by auditory  
165 evoked potentials caused by the TMS coil discharge click (Nikouline et al. 1999), white  
166 noise was delivered to the participants through earphones during the TMS-EEG  
167 recordings (Massimini et al. 2005; Casarotto et al. 2010). The sound pressure level  
168 was calibrated until participants indicated that they could no longer hear the TMS  
169 clicks.



170 TMS stimuli were applied to the hand knob of the left M1 using a focal figure-of-eight  
171 coil (external loop diameter: 90 mm). The coil was connected through a BiStim module  
172 with a Magstim 200<sup>2</sup> magnetic stimulator (all devices from Magstim Co, Whitland,  
173 Dyfed, UK) with a monophasic current waveform. The coil was oriented with the handle  
174 pointing backwards and 45° away from the midline, to induce current in the brain  
175 oriented from lateral-posterior to anterior-medial (Di Lazzaro et al. 2008). The optimal  
176 coil position to elicit MEPs in the right abductor pollicis brevis (APB) muscle was  
177 determined as the site that produced consistently the largest MEPs using a stimulation  
178 intensity slightly above RMT (motor “hotspot”) (Groppa et al. 2012). MEPs were  
179 recorded through surface EMG electrodes (Ag-AgCl cup electrodes) in a belly-tendon  
180 montage. The EMG signal was recorded using the Spike2 software (Cambridge  
181 Electronic Design). The EMG raw signal was amplified (Digitimer D360 8-channel  
182 amplifier), bandpass filtered (20 Hz - 2 kHz) and digitized at an A/D rate of 10 kHz  
183 (CED Micro 1401; Cambridge Electronic Design). For constant coil placement  
184 throughout the experiment, the coil position at the APB hotspot was marked on the  
185 EEG cap. All TMS pulses were applied to the APB hotspot at an intensity of 100 %  
186 RMT (Premoli et al. 2014; Darmani et al. 2016; Darmani et al. 2018b), to limit possible  
187 contamination of TEPs by re-afferent signals from MEPs (Fecchio et al. 2017). The  
188 RMT was re-tested at the beginning of the post-drug measurements (Fig. 1) and, if  
189 different from pre-drug RMT, TMS intensity was adjusted to keep the re-afferent  
190 signals similar across pre- and post-drug measurements. The inter-trial interval was 5  
191 s  $\pm$  25 % random variation to limit habituation.

#### 192 *Data processing*

193 EEG data processing and analysis were performed using customized analysis scripts  
194 on MATLAB R2016a and the Fieldtrip open source MATLAB toolbox (Oostenveld et

195 al. 2011). The continuous EEG data was segmented into epochs from -600 to 600 ms  
196 relative to the TMS pulse. EEG data from 1 ms before to 15 ms after the TMS pulse  
197 were removed and spline interpolated (Thut et al. 2011). Afterwards, data was down-  
198 sampled to 1000 Hz. Bad trials and noisy channels were removed by means of visual  
199 inspection of the EEG epochs (mean percentage of removed epochs  $\pm$  SD:  $25.4 \pm 12.0$   
200 %; mean number  $\pm$  SD of removed channels:  $4.5 \pm 2.5$ ). Then, independent component  
201 analysis (ICA) was applied to the EEG data in a two-steps procedure (Rogasch et al.  
202 2014). In a first ICA step, TMS related artefacts were removed (mean number of  
203 removed components  $\pm$  SD:  $4.3 \pm 2.6$ ). Subsequently the data was filtered with a 1-80  
204 Hz Butterworth zero phase band pass filter (3<sup>rd</sup> order) and a 49-51 Hz notch filter. ICA  
205 was then performed again and components representing physiological (i.e., eye  
206 blinking or eye movements, muscle artifacts), electrical or small amplitude TMS related  
207 artefacts were removed (mean number of removed components  $\pm$  SD:  $13.6 \pm 6.2$ ).  
208 Successively, removed channels were interpolated using the signal of the neighboring  
209 channels (Perrin et al. 1989) and data were re-referenced to linked mastoids (average  
210 of EEG electrodes TP9 and TP10). Finally, data were baseline-corrected by  
211 subtracting the average of the signal in the time window from 600 to 100 ms prior to  
212 the TMS pulse (Premoli et al. 2014) and were smoothed with a 45 Hz low pass filter  
213 (Butterworth zero phase band pass filter, 3<sup>rd</sup> order). TEPs were analyzed channel-wise,  
214 by averaging the EEG data of all retained trials, separately for the pre- and post-drug  
215 measurements.

216 For MEP analysis, EMG data were epoched from -100 to 100 ms around the TMS  
217 pulse. An epoch was discarded if the absolute value of the mean EMG signal 100 to 0  
218 ms before the TMS pulse exceeded a pre-innervation threshold  $> 0.02$  mV. The mean  
219 percentage ( $\pm$  SD) of discarded epochs due to pre-innervation was  $11.0 \pm 17.9\%$ .

220 *Statistics*

221 Five non-overlapping time windows of interest (TOIs) were *a priori* defined based on  
222 the group average TEPs across subjects, pre- and post-drug measurements, the four  
223 drug sessions and all EEG channels. TOIs were centered around the latencies of the  
224 canonical M1 TEP peaks P25, N45, P70, N100 and P180 (Komssi et al. 2004a; Bonato  
225 et al. 2006; Premoli et al. 2014). Specifically, TOIs were set at 16-34 ms (P25), 38-55  
226 ms (N45), 56-82 ms (P70), 89-133 ms (N100), and 173-262 ms (P180) after the TMS  
227 pulse. For each condition, drug-induced TEP modulations were evaluated for each  
228 individual TOI using channel-wise paired-sample t-tests. Family-wise error rate  
229 (FWER) was controlled by using a cluster-based permutation approach (Maris and  
230 Oostenveld 2007), as implemented in Fieldtrip. This approach tests the null hypothesis  
231 that data in the experimental conditions are drawn from the same probability  
232 distribution and clusters the t-values resulting from the paired-sample t-tests that  
233 exceed an *a priori* defined threshold of  $p < 0.05$ , based on neighboring channels and  
234 time points. The minimum number of channels below the significance threshold to form  
235 a cluster was 2. The t-statistics at cluster level was then computed summing the t-  
236 values within each cluster and comparing the maximum of the obtained t-values. A  
237 reference distribution of the maximum of the cluster t-values was obtained by re-  
238 applying the same procedure on the data randomized across the pre-drug vs. post-  
239 drug measurements. We used 1500 randomizations to obtain the reference distribution  
240 and rejected the null hypothesis with  $p < 0.05$  if less than 5 % of the permutations used  
241 to construct the reference distribution yielded a maximum cluster-level t-value larger  
242 than the one observed in the original data. The same cluster-based approach was  
243 used to assess differences between TEPs in the pre-drug measurements of the four  
244 drug conditions. To adjust for multiple comparisons, a Bonferroni correction was  
245 applied to the obtained p-value.

246 A repeated measure analysis of variance (rmANOVA) with the within-subject effects of  
247 DRUG (4 levels: perampanel, dextromethorphan, nimodipine, placebo) and TIME (2  
248 levels: pre-drug, post-drug) was run on the RMT and MEP amplitude data. The  
249 Shapiro-Wilk test was applied to test for normal distribution. The MEP data were log-  
250 transformed to achieve normal distribution. Sphericity was checked using Mauchly's  
251 test and, whenever violated, the Greenhouse-Geisser correction of the degrees of  
252 freedom was applied. For all tests, the significance level was set to  $p < 0.05$ .

253

## 254 **Results**

255 TMS was well tolerated by all subjects. In one case, a dosage of 12 mg perampanel  
256 caused dizziness, nausea and ataxia, which led to reduction of the dosage to 6 mg for  
257 the remaining 13 subjects (i.e., 3 of the reported subjects received 12 mg, the other 13  
258 subjects received 6 mg of perampanel). Otherwise, drugs were well tolerated by all  
259 subjects, apart from minor nausea and slight dizziness reported after perampanel and  
260 dextromethorphan intake.

261

### 262 *Drug effects on RMT and MEP amplitude*

263 The rmANOVA on RMT values revealed a significant DRUG\*TIME interaction ( $F_{3,45} =$   
264  $8.993$ ,  $p < 0.001$ ). *Post hoc* paired t-tests demonstrated a mean RMT increase (post-  
265 drug/pre-drug)  $\pm$  SD after perampanel ( $1.09 \pm 0.08$ ;  $t_{15} = 4.11$ ,  $p < 0.001$ ) and  
266 nimodipine ( $1.04 \pm 0.04$ ;  $t_{15} = 2.91$ ,  $p = 0.007$ ) but not dextromethorphan ( $0.99 \pm 0.07$ ,  
267  $t_{15} = 0.94$ ,  $p = 0.36$ ), with compared to RMT change under placebo ( $0.97 \pm 0.07$ ).

268 Importantly, the rmANOVA did not reveal any significant effects of DRUG, TIME or  
269 interaction DRUG\*TIME on MEP amplitude (Table 1).

270 **Table 1.** Pre-drug vs. post-drug measurements of RMT (percent maximum stimulator  
271 output, %MSO) and MEP amplitudes (mV) (all data, mean  $\pm$  SD)

| Drug             | RMT pre-drug (%MSO) | RMT post-drug (%MSO) | MEP pre-drug (mV) | MEP post-drug (mV) |
|------------------|---------------------|----------------------|-------------------|--------------------|
| Perampanel       | 40.0 $\pm$ 6.4      | 43.6 $\pm$ 7.6       | 0.19 $\pm$ 0.31   | 0.16 $\pm$ 0.16    |
| Dextromethorphan | 40.9 $\pm$ 7.5      | 40.4 $\pm$ 6.7       | 0.17 $\pm$ 0.35   | 0.18 $\pm$ 0.20    |
| Nimodipine       | 40.4 $\pm$ 7.2      | 41.8 $\pm$ 7.1       | 0.18 $\pm$ 0.07   | 0.19 $\pm$ 0.37    |
| Placebo          | 40.8 $\pm$ 5.8      | 38.7 $\pm$ 8.3       | 0.18 $\pm$ 0.21   | 0.16 $\pm$ 0.16    |

272 *TEPs*

273 Pre-drug TEPs and their topographical distributions (**Fig. 2**) were consistent with  
274 previous studies of single pulse TMS over M1 (Komssi et al. 2004b; Bonato et al. 2006;  
275 Premoli et al. 2014; Darmani et al. 2016). Pre-drug TEPs did not differ between the  
276 four drug conditions (all pairwise comparisons,  $p > 0.05$ ).

277 In the placebo and nimodipine conditions there was no significant difference in the  
278 post-drug vs. pre-drug measurement in any of the five TOIs (all  $p > 0.05$ ; **Fig. 3**).  
279 Perampanel resulted in a decrease of the P70 amplitude ( $p = 0.002$ ; **Fig. 3A, B**). This  
280 difference was expressed in predominantly in EEG channels in the non-stimulated  
281 hemisphere (**Fig. 4B**, top row). Dextromethorphan increased the N45 amplitude ( $p =$   
282  $0.027$ ; **Fig. 3**). The difference was expressed in a bilateral pericentral cluster of  
283 electrodes in the stimulated and non-stimulated hemisphere (**Fig. 4B**, bottom row).

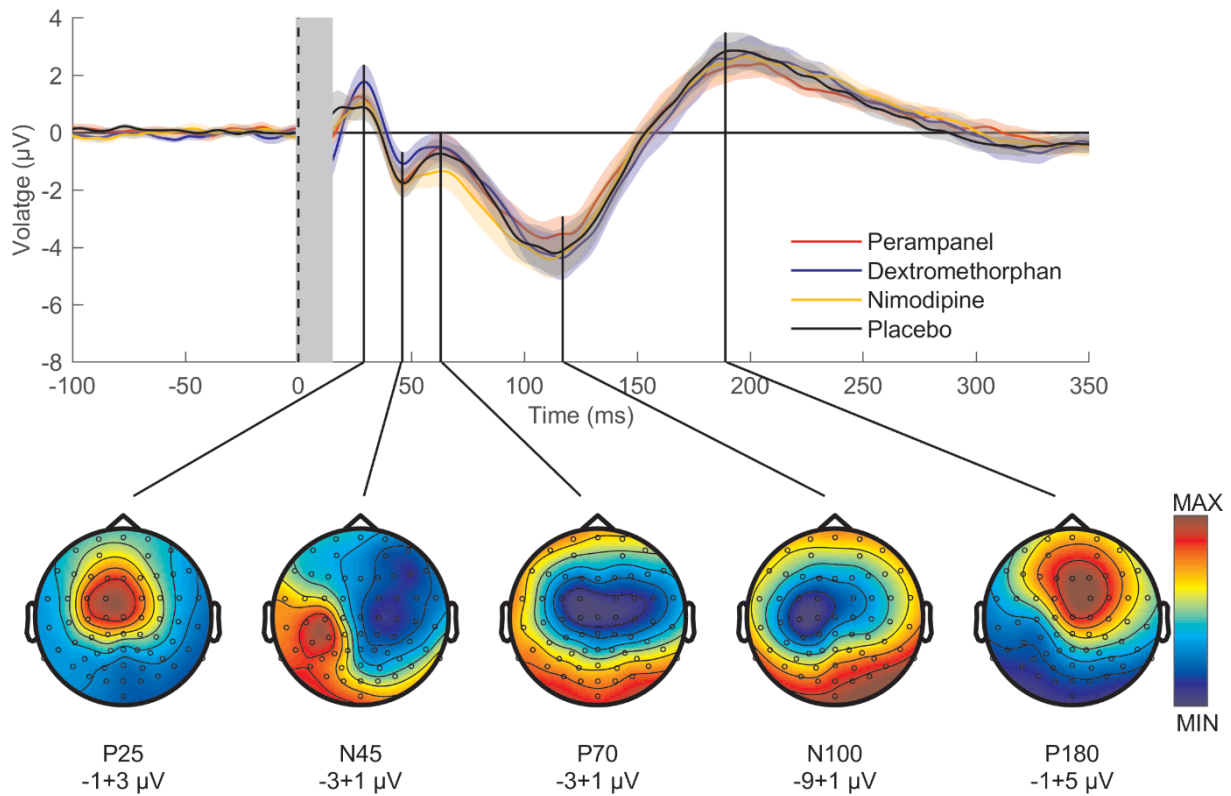

284

285

286

287

288

289

290

291

292

293

**Figure 2. Group average of TEPs evoked by single-pulse TMS of M1 before drug intake.** Top panel: pre-drug TEPs averaged across all subjects ( $n = 16$ ) and EEG electrodes for perampanel (red curve), dextromethorphan (blue curve), nimodipine (yellow curve) and placebo (black curve). Shades represent  $\pm 1$  SEM. The vertical gray bar represents the time window affected by the TMS artefact that has been removed and interpolated. Bottom panel: pre-drug TEP topographies averaged across subjects ( $n = 16$ ) and conditions. Each topography was obtained by averaging the signal in the respective TOI (P25: 16-34 ms, N45: 38-55 ms, P70: 56-82 ms, N100: 89-133 ms, P180: 173-262 ms). Data are voltages at sensor level (ranges indicated underneath the plots), while colors are normalized to maximum/minimum voltage.

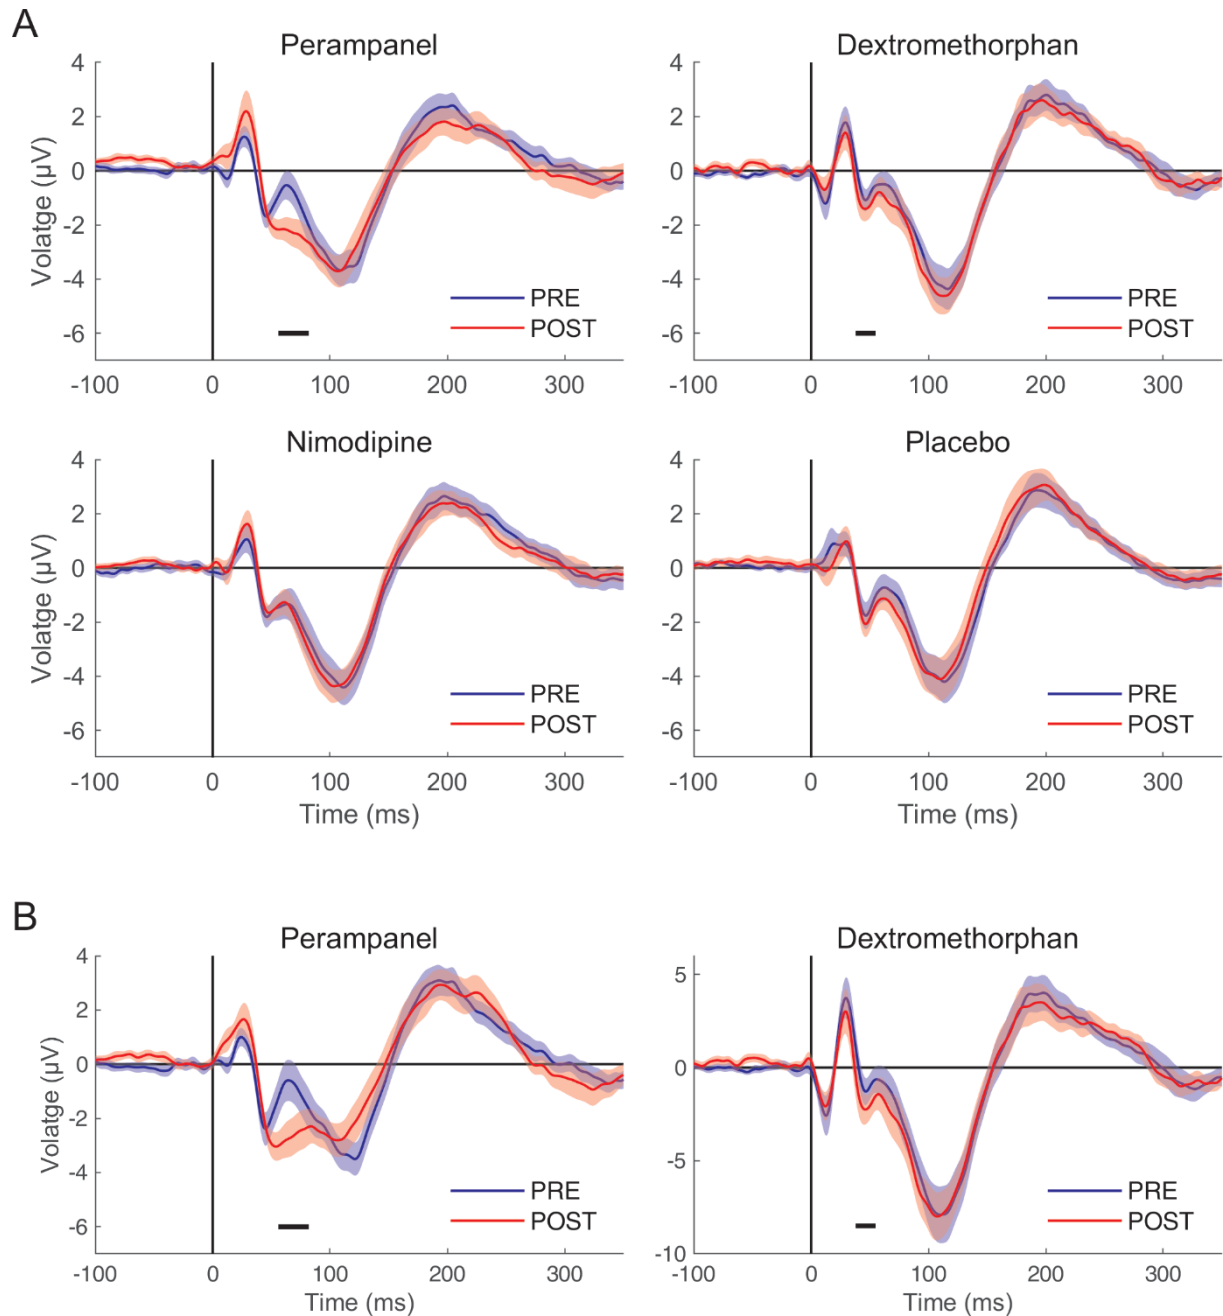

294

295 **Figure 3. Group average of TEPs pre- and post-drug intake. (A)** Each panel shows the average TEP  
296 time course across subjects and all EEG channels of pre-drug (blue curve) vs. post-drug measurements  
297 (red curve) for the four drug conditions. Shades represent  $\pm 1$  SEM. Significant differences between the  
298 pre- and post-drug measurements are indicated with horizontal black bars. **(B)** To better elucidate the  
299 drug-induced changes of TEP components shown in (A), the same average TEP time courses are  
300 displayed for significant channels only (cf. Fig. 4). Shades represent  $\pm 1$  SEM.

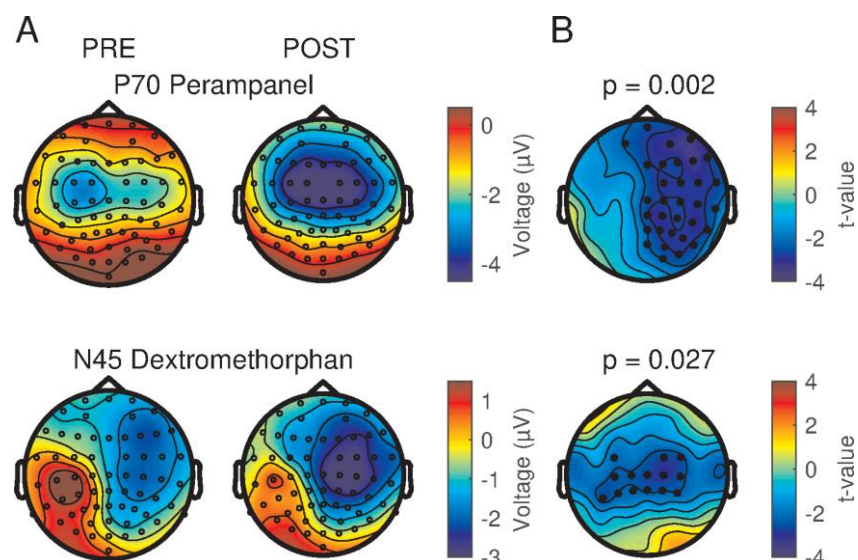

301

302 **Figure 4. Topographical surface voltage maps for significantly different TEP components. (A)**

303 Topography of P70 before (left) and after (right) intake of perampanel (top row) and topography of N45

304 before (left) and after (right) intake of dextromethorphan (bottom row). **(B)** T-value statistical maps with

305 channels belonging to significant clusters highlighted as black dots.

306 Single subject data of drug-induced modulations of the P70 and N45 amplitudes are

307 displayed in **Fig. 5** to demonstrate consistency across subjects.

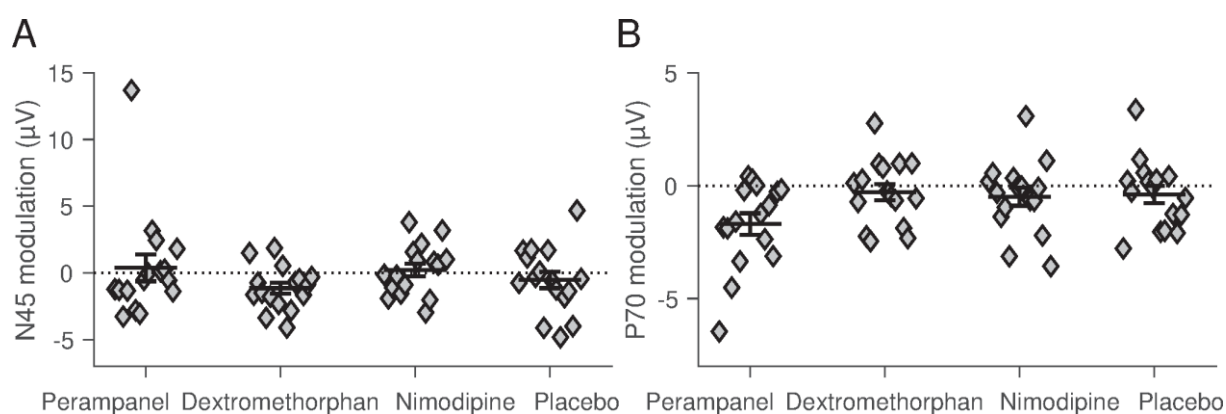

308

309 **Figure 5. Scatter plots of single subject drug-induced TEP changes.** Amplitude modulations (post-

310 drug minus pre-drug) of the N45 **(A)** and P70 **(B)** TEP components for perampanel, dextromethorphan,

311 nimodipine and placebo. For the investigated TEP components, amplitudes were calculated as the

312 average voltage for identified significant channels for dextromethorphan (N45) and perampanel (P70).

313 Error bars indicate mean  $\pm 1$  SEM.



## 314 **Discussion**

315 In this study, we investigated modulation of TMS-evoked EEG potentials by a single  
316 oral dose of an AMPA receptor antagonist (perampanel), an NMDA receptor antagonist  
317 (dextromethorphan), and an L-VGCC blocker (nimodipine). Perampanel decreased the  
318 P70 amplitude, whereas dextromethorphan increased the N45 amplitude. Nimodipine  
319 and placebo had no effect on TEP amplitudes. Our results show specific modulation  
320 resulting from drugs that act on glutamate receptors. The differential effects are likely  
321 caused by differences in the specific modes of drug action, as discussed in detail  
322 below.

### 323 *N45 modulation by dextromethorphan*

324 Dextromethorphan binds preferentially to NMDA receptors and reduces EPSPs due to  
325 inhibition of calcium influx. In paired-pulse TMS-EMG studies, dextromethorphan  
326 decreased intracortical facilitation (Ziemann et al. 1998), a marker of glutamatergic  
327 neurotransmission (Ziemann et al. 2015), while it did not affect RMT or MEP amplitude  
328 (Ziemann et al. 1998; Fitzgerald et al. 2005; Wankerl et al. 2010). This pattern of effects  
329 on TMS-EMG measures is like the one of benzodiazepines, which also reduce  
330 intracortical facilitation (Ziemann et al. 1996; Ziemann et al. 2015), probably through  
331 enhancement of short-interval intracortical inhibition, a marker of GABAergic  
332 inhibitory postsynaptic potentials (IPSPs) that superimposes with intracortical  
333 facilitation (Hanajima et al. 1998). At the level of TMS-EEG measurements,  
334 dextromethorphan showed a virtually identical effect as benzodiazepines (Premoli et  
335 al. 2014; Premoli et al. 2018) by increasing the N45 amplitude (cf. Fig. 6). Therefore,  
336 the present data lead to the proposition that the N45 amplitude reflects excitation-  
337 inhibition balance of EPSPs and IPSPs evoked by the TMS pulse. This significantly

338 extends the previous view that the N45 amplitude exclusively reflects GABAergic  
339 inhibition (Premoli et al. 2014; Darmani et al. 2016; Premoli et al. 2018).  
340 Of note, while the enhancing effects of the NMDA receptor antagonist  
341 dextromethorphan and benzodiazepines on the N45 amplitude are similar,  
342 dextromethorphan (and perampanel) had no effect on the N100 amplitude in the non-  
343 stimulated hemisphere, while benzodiazepines decreased it (Premoli et al. 2014;  
344 Premoli et al. 2018). Together, these findings support the idea that the N100 in the  
345 frontal cortex of the non-stimulated hemisphere reflects propagated neural activity  
346 controlled by GABAergic but not glutamatergic neurotransmission.

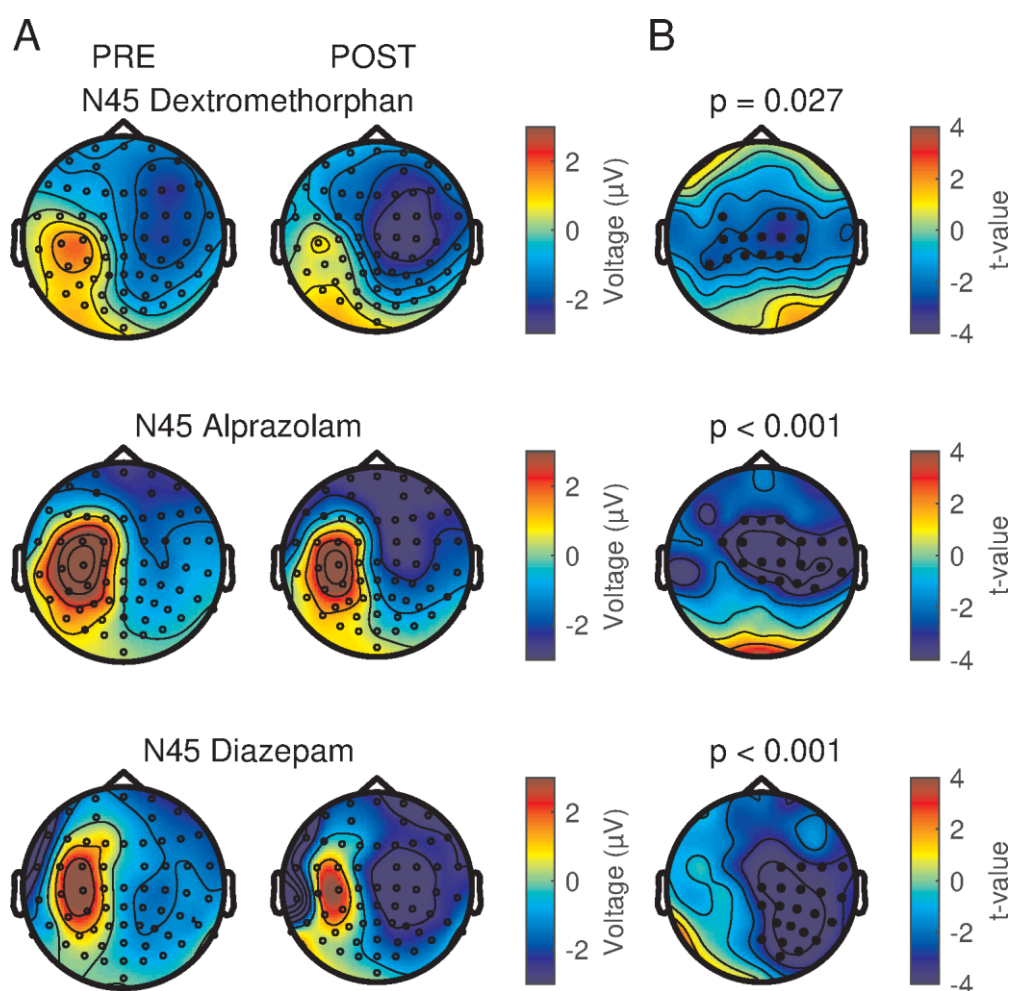

347  
348 **Figure 6. Comparison of the modulation of the N45 TEP by dextromethorphan and two classical**  
349 **benzodiazepines (alprazolam and diazepam, results adapted from (Premoli et al. 2014)).** First two  
350 columns show voltage surface maps of N45 recorded before and after drug intake. The third column

351 shows t-statistic maps of the N45 cluster post-drug versus pre-drug differences. Electrodes of the  
352 significant clusters are denoted by black dots.

### 353 *P70 modulation by perampanel*

354 AMPA receptor activation in response to glutamate binding generates fast EPSPs  
355 followed by rapid current decay (Niciu et al. 2012). The effect of the AMPA receptor  
356 antagonist perampanel was specific by reducing the P70 amplitude. Importantly, this  
357 effect was almost exclusively expressed in the non-stimulated right hemisphere (cf.  
358 Fig. 4), suggesting that the effect of perampanel is specific on interhemispherically  
359 propagated neural activity. This finding is in close agreement with intrahemispheric and  
360 interhemispheric spread of epileptiform activity in rodent cortical slices that was not  
361 influenced by application of the NMDA receptor antagonist D-2-amino-5-  
362 phosphonovaleric acid (D-APV), but blocked by the AMPA receptor antagonist 6-  
363 cyano-7-nitroquinoxaline-2,3-dione (CNQX) (Alefeld et al. 1998; Telfeian and Connors  
364 1999). The P70 has not shown reactivity to any other of the so far tested drugs (positive  
365 allosteric modulators at the GABAA receptor, alpha-5 GABAA receptor antagonist,  
366 GABAB receptor agonist, voltage-gated sodium channel blockers, NMDA receptor  
367 antagonist, L-VGCC blocker) (Premoli et al. 2014; Darmani et al. 2016; Premoli et al.  
368 2017; Premoli et al. 2018). We therefore propose that the P70 amplitude reflects  
369 glutamatergic (interhemispheric) signal propagation mediated by AMPA receptor  
370 activation. Whether the P70 amplitude is exaggerated in epilepsy, and may be used  
371 as a biomarker to predict antiepileptic drug responses, is currently unclear, as the very  
372 few available TEP studies were performed exclusively in patients with generalized  
373 epilepsies on antiepileptic drug treatment, without alteration of the P70 amplitude  
374 (Julkunen et al. 2013; Ter Braack et al. 2016; Kimiskidis et al. 2017).

375 *Absence of TEP modulation by nimodipine*

376 L-VGCCs are expressed on dendrites of neurons throughout the central nervous  
377 system. They contribute to regulation of neuronal excitability. L-VGCCs open from their  
378 closed/resting state only upon strong postsynaptic depolarization (Nowycky et al.  
379 1985). In addition, L-VGCCs are not significantly involved in controlling glutamate  
380 release from presynaptic nerve terminals (Catterall 2011). Therefore, L-VGCCs should  
381 not play a role in the initial excitation of neurons by the TMS pulse in resting motor  
382 cortex. Accordingly, nimodipine had no or only very minor effects on RMT or MEP  
383 recruitment curve in the present and previous studies (Wankerl et al. 2010; Weise et  
384 al. 2017), and did not show any effect on TEPs in the present study. Finally, a failure  
385 to obtain a nimodipine effect on TEPs due to a too low dosage can be largely excluded,  
386 as the same single oral dose of 30 mg resulted in significant suppression of long-term  
387 potentiation and long-term depression-like plasticity in human motor cortex (Wolters et  
388 al. 2003; Wankerl et al. 2010; Weise et al. 2017).

389 **Conclusions**

390 Findings support the general notion that TEPs evoked by single-pulse TMS of M1 can  
391 be used as markers of excitability and propagated neural activity in the human brain.  
392 Specifically, the effects of the NMDA receptor antagonist dextromethorphan extend  
393 our understanding of the N45 potential to reflect excitation-inhibition balance regulated  
394 by NMDA and GABAA receptors. Furthermore, the suppressive effects of perampanel  
395 on the P70 potential in the non-stimulated hemisphere support the idea that this  
396 propagated activity is controlled by glutamatergic neurotransmission through AMPA  
397 receptors. Finally, the null effects of the L-VGCC blocker nimodipine on TEPs are in  
398 accord with the known physiology of L-VGCCs on neuronal excitability. Altogether,  
399 pharmaco-TMS-EEG advances our knowledge of the physiology underlying TEPs, and

400 this may be of directly utility in interpreting TEP abnormalities in neurological and  
401 psychiatric disorders with pathological neural excitability or signal propagation in brain  
402 networks.

403

#### 404 **Acknowledgements**

405 This work was supported by a grant from the German Research Foundation (DFG ZI 542/9-1)  
406 to U.Z.

407

#### 408 **Conflicts of Interest**

409 U.Z. received grants from the German Ministry of Education and Research (BMBF), Biogen  
410 Idec GmbH, Servier, and Janssen Pharmaceuticals NV, and consulting fees from Biogen Idec  
411 GmbH, Bayer Vital GmbH, Bristol Myers Squibb GmbH, Pfizer GmbH, CorTec GmbH, and  
412 Medtronic GmbH, all not related to this work. All other authors declare that they have no  
413 conflicts of interest.

414 **References**

- 415 Alefeld M, Sutor B, Luhmann HJ. 1998. Pattern and pharmacology of propagating epileptiform  
416 activity in mouse cerebral cortex. *Experimental neurology*. 153:113-122.
- 417 Blasco H, Mavel S, Corcia P, Gordon PH. 2014. The glutamate hypothesis in ALS:  
418 pathophysiology and drug development. *Current medicinal chemistry*. 21:3551-3575.
- 419 Bonato C, Miniussi C, Rossini PM. 2006. Transcranial magnetic stimulation and cortical  
420 evoked potentials: a TMS/EEG co-registration study. *Clin Neurophysiol*. 117:1699-1707.
- 421 Casarotto S, Romero Lauro LJ, Bellina V, Casali AG, Rosanova M, Pigorini A, Defendi S,  
422 Mariotti M, Massimini M. 2010. EEG responses to TMS are sensitive to changes in the  
423 perturbation parameters and repeatable over time. *PloS one*. 5:e10281.
- 424 Cash RF, Noda Y, Zomorodi R, Radhu N, Farzan F, Rajji TK, Fitzgerald PB, Chen R,  
425 Daskalakis ZJ, Blumberger DM. 2017. Characterisation of Glutamatergic and GABAA  
426 Mediated Neurotransmission in Motor and Dorsolateral Prefrontal Cortex using Paired-Pulse  
427 TMS-EEG. *Neuropsychopharmacology : official publication of the American College of*  
428 *Neuropsychopharmacology*. 42:502-511.
- 429 Catterall WA. 2011. Voltage-gated calcium channels. *Cold Spring Harb Perspect Biol*.  
430 3:a003947.
- 431 Chung SW, Rogasch NC, Hoy KE, Fitzgerald PB. 2015. Measuring Brain Stimulation Induced  
432 Changes in Cortical Properties Using TMS-EEG. *Brain stimulation*. 8:1010-1020.
- 433 Darmani G, Bergmann T, Zipser C, Bauer D, Müller-Dahlhaus F, Ziemann U. 2018a. Effects  
434 of antiepileptic drugs on cortical excitability in humans. A TMS-EMG and TMS-EEG study.  
435 *Hum Brain Mapp*.
- 436 Darmani G, Bergmann TO, Zipser C, Baur D, Müller-Dahlhaus F, Ziemann U. 2018b. Effects  
437 of antiepileptic drugs on cortical excitability in humans: A TMS-EMG and TMS-EEG study.  
438 *Human brain mapping*.
- 439 Darmani G, Zipser CM, Böhmer GM, Deschet K, Müller-Dahlhaus F, Belardinelli P, Schwab  
440 M, Ziemann U. 2016. Effects of the Selective alpha5-GABAAR Antagonist S44819 on  
441 Excitability in the Human Brain: A TMS-EMG and TMS-EEG Phase I Study. *J Neurosci*.  
442 36:12312-12320.
- 443 Di Lazzaro V, Ziemann U, Lemon RN. 2008. State of the art: Physiology of transcranial motor  
444 cortex stimulation. *Brain stimulation*. 1:345-362.

- 445 Dmochowski JP, Koessler L, Norcia AM, Bikson M, Parra LC. 2017. Optimal use of EEG  
446 recordings to target active brain areas with transcranial electrical stimulation. *Neuroimage*.  
447 157:69-80.
- 448 Eid T, Williamson A, Lee TS, Petroff OA, de Lanerolle NC. 2008. Glutamate and astrocytes--  
449 key players in human mesial temporal lobe epilepsy? *Epilepsia*. 49 Suppl 2:42-52.
- 450 Faulkner MA. 2017. Spotlight on perampanel in the management of seizures: design,  
451 development and an update on place in therapy. *Drug Des Devel Ther*. 11:2921-2930.
- 452 Fecchio M, Pigorini A, Comanducci A, Sarasso S, Casarotto S, Premoli I, Derchi CC, Mazza  
453 A, Russo S, Resta F, Ferrarelli F, Mariotti M, Ziemann U, Massimini M, Rosanova M. 2017.  
454 The spectral features of EEG responses to transcranial magnetic stimulation of the primary  
455 motor cortex depend on the amplitude of the motor evoked potentials. *PLoS one*. 12:e0184910.
- 456 Fitzgerald PB, Benitez J, Oxley T, Daskalakis JZ, de Castella AR, Kulkarni J. 2005. A study of  
457 the effects of lorazepam and dextromethorphan on the response to cortical 1 Hz repetitive  
458 transcranial magnetic stimulation. *Neuroreport*. 16:1525-1528.
- 459 Groppa S, Oliviero A, Eisen A, Quartarone A, Cohen LG, Mall V, Kaelin-Lang A, Mima T, Rossi  
460 S, Thickbroom GW, Rossini PM, Ziemann U, Valls-Sole J, Siebner HR. 2012. A practical guide  
461 to diagnostic transcranial magnetic stimulation: Report of an IFCN committee. *Clin  
462 Neurophysiol*. 123:858-882.
- 463 Hanajima R, Ugawa Y, Terao Y, Sakai K, Furubayashi T, Machii K, Kanazawa I. 1998. Paired-  
464 pulse magnetic stimulation of the human motor cortex: differences among I waves. *The Journal  
465 of physiology*. 509:607-618.
- 466 Hasan A, Malchow B, Falkai P, Schmitt A. 2014. [The glutamate hypothesis of schizophrenia].  
467 *Fortschritte der Neurologie-Psychiatrie*. 82:447-456.
- 468 Hess CW, Mills K, Murray N. 1987. Responses in small hand muscles from magnetic  
469 stimulation of the human brain. *J Physiol*. 388:397-419.
- 470 Hess P, Lansman JB, Tsien RW. 1984. Different modes of Ca channel gating behaviour  
471 favoured by dihydropyridine Ca agonists and antagonists. *Nature*. 311:538-544.
- 472 Igelmund P, Zhao YQ, Heinemann U. 1996. Effects of T-type, L-type, N-type, P-type, and Q-  
473 type calcium channel blockers on stimulus-induced pre- and postsynaptic calcium fluxes in rat  
474 hippocampal slices. *Experimental brain research Experimentelle Hirnforschung*. 109:22-32.
- 475 Ilmoniemi RJ, Kicic D. 2010. Methodology for combined TMS and EEG. *Brain topography*.  
476 22:233-248.

- 477 Julkunen P, Säisänen L, Könönen M, Vanninen R, Kälviäinen R, Mervaala E. 2013. TMS-EEG  
478 reveals impaired intracortical interactions and coherence in Unverricht-Lundborg type  
479 progressive myoclonus epilepsy (EPM1). *Epilepsy research*. 106:103-112.
- 480 Kimiskidis VK, Tsimpiris A, Rylvlin P, Kalviainen R, Koutroumanidis M, Valentin A, Laskaris N,  
481 Kugiumtzis D. 2017. TMS combined with EEG in genetic generalized epilepsy: A phase II  
482 diagnostic accuracy study. *Clin Neurophysiol*. 128:367-381.
- 483 Komssi S, Kähkönen S, Ilmoniemi RJ. 2004a. The effect of stimulus intensity on brain  
484 responses evoked by transcranial magnetic stimulation. *Hum Brain Mapp*. 21:154-164.
- 485 Komssi S, Kähkönen S, Ilmoniemi RJ. 2004b. The effect of stimulus intensity on brain  
486 responses evoked by transcranial magnetic stimulation. *Human brain mapping*. 21:154-164.
- 487 Lioumis P, Kicic D, Savolainen P, Mäkelä JP, Kähkönen S. 2009. Reproducibility of TMS-  
488 Evoked EEG responses. *Human brain mapping*. 30:1387-1396.
- 489 Mäki H, Ilmoniemi RJ. 2010. The relationship between peripheral and early cortical activation  
490 induced by transcranial magnetic stimulation. *Neuroscience letters*. 478:24-28.
- 491 Maris E, Oostenveld R. 2007. Nonparametric statistical testing of EEG- and MEG-data. *Journal*  
492 *of neuroscience methods*. 164:177-190.
- 493 Massimini M, Ferrarelli F, Huber R, Esser SK, Singh H, Tononi G. 2005. Breakdown of cortical  
494 effective connectivity during sleep. *Science*. 309:2228-2232.
- 495 Niciu MJ, Kelmendi B, Sanacora G. 2012. Overview of glutamatergic neurotransmission in the  
496 nervous system. *Pharmacology, biochemistry, and behavior*. 100:656-664.
- 497 Nikouline V, Ruohonen J, Ilmoniemi RJ. 1999. The role of the coil click in TMS assessed with  
498 simultaneous EEG. *Clin Neurophysiol*. 110:1325-1328.
- 499 Nowycky MC, Fox AP, Tsien RW. 1985. Three types of neuronal calcium channel with different  
500 calcium agonist sensitivity. *Nature*. 316:440-443.
- 501 Oldfield RC. 1971. The assessment and analysis of handedness: the Edinburgh inventory.  
502 *Neuropsychologia*. 9:97-113.
- 503 Oostenveld R, Fries P, Maris E, Schoffelen JM. 2011. FieldTrip: Open source software for  
504 advanced analysis of MEG, EEG, and invasive electrophysiological data. *Computational*  
505 *intelligence and neuroscience*. 2011:156869.
- 506 Perrin F, Pernier J, Bertrand O, Echallier J. 1989. Spherical splines for scalp potential and  
507 current density mapping. *Electroencephalogr Clin Neurophysiol*. 72:184-187.
- 508 Premoli I, Biondi A, Carlesso S, Rivolta D, Richardson MP. 2017. Lamotrigine and  
509 levetiracetam exert a similar modulation of TMS-evoked EEG potentials. *Epilepsia*. 58:42-50.



- 510 Premoli I, Castellanos N, Rivolta D, Belardinelli P, Bajo R, Zipser C, Espenhahn S, Heidegger  
511 T, Müller-Dahlhaus F, Ziemann U. 2014. TMS-EEG signatures of GABAergic  
512 neurotransmission in the human cortex. *J Neurosci.* 34:5603–5612.
- 513 Premoli I, Kiraly J, Müller-Dahlhaus F, Zipser CM, Rossini P, Zrenner C, Ziemann U,  
514 Belardinelli P. 2018. Short-interval and long-interval intracortical inhibition of TMS-evoked EEG  
515 potentials. *Brain stimulation.* 11:818-827.
- 516 Rogasch NC, Fitzgerald PB. 2013. Assessing cortical network properties using TMS-EEG.  
517 *Human brain mapping.* 34:1652-1669.
- 518 Rogasch NC, Thomson RH, Farzan F, Fitzgibbon BM, Bailey NW, Hernandez-Pavon JC,  
519 Daskalakis ZJ, Fitzgerald PBJN. 2014. Removing artefacts from TMS-EEG recordings using  
520 independent component analysis: importance for assessing prefrontal and motor cortex  
521 network properties. *Neuroimage.* 101:425-439.
- 522 Rogawski MA, Hanada T. 2013. Preclinical pharmacology of perampanel, a selective non-  
523 competitive AMPA receptor antagonist. *Acta Neurol Scand.* 127:19-24.
- 524 Rossi S, Hallett M, Rossini PM, Pascual-Leone A, Safety of TMS. 2009. Safety, ethical  
525 considerations, and application guidelines for the use of transcranial magnetic stimulation in  
526 clinical practice and research. *Clin Neurophysiol.* 120:2008-2039.
- 527 Smith M, Keel J, Greenberg B, Adams L, Schmidt P, Rubinow D, Wassermann EM. 1999.  
528 Menstrual cycle effects on cortical excitability. *Neurology.* 53:2069-2069.
- 529 Stefan K, Kunesch E, Benecke R, Cohen LG, Classen J. 2002. Mechanisms of enhancement  
530 of human motor cortex excitability induced by interventional paired associative stimulation. *The*  
531 *Journal of physiology.* 543:699-708.
- 532 Tatti R, Haley MS, Swanson OK, Tselha T, Maffei A. 2017. Neurophysiology and Regulation  
533 of the Balance Between Excitation and Inhibition in Neocortical Circuits. *Biological psychiatry.*  
534 81:821-831.
- 535 Telfeian AE, Connors BW. 1999. Epileptiform propagation patterns mediated by NMDA and  
536 non-NMDA receptors in rat neocortex. *Epilepsia.* 40:1499-1506.
- 537 Ter Braack EM, Koopman AE, van Putten MJ. 2016. Early TMS evoked potentials in epilepsy:  
538 A pilot study. *Clin Neurophysiol.* 127:3025-3032.
- 539 Thut G, Veniero D, Romei V, Miniussi C, Schyns P, Gross J. 2011. Rhythmic TMS causes  
540 local entrainment of natural oscillatory signatures. *Curr Biol.* 21:1176-1185.
- 541 Tremblay S, Rogasch NC, Premoli I, Blumberger DM, Casarotto S, Chen R, Di Lazzaro V,  
542 Farzan F, Ferrarelli F, Fitzgerald PB, Hui J, Ilmoniemi RJ, Kimiskidis VK, Kugiumtzis D, Lioumis

- 543 P, Pascual-Leone A, Pellicciari MC, Rajji T, Thut G, Zomorodi R, Ziemann U, Daskalakis ZJ.  
544 2019. Clinical utility and prospective of TMS–EEG. *Clin Neurophysiol.* 130.
- 545 Wankerl K, Weise D, Gentner R, Rumpf JJ, Classen J. 2010. L-type voltage-gated Ca<sup>2+</sup>  
546 channels: a single molecular switch for long-term potentiation/long-term depression-like  
547 plasticity and activity-dependent metaplasticity in humans. *J Neurosci.* 30:6197-6204.
- 548 Weise D, Mann J, Rumpf JJ, Hallermann S, Classen J. 2017. Differential Regulation of Human  
549 Paired Associative Stimulation-Induced and Theta-Burst Stimulation-Induced Plasticity by L-  
550 type and T-type Ca<sup>2+</sup> Channels. *Cereb Cortex.* 27:4010-4021.
- 551 Wolters A, Sandbrink F, Schlottmann A, Kunesch E, Stefan K, Cohen LG, Benecke R, Classen  
552 J. 2003. A temporally asymmetric Hebbian rule governing plasticity in the human motor cortex.  
553 *Journal of neurophysiology.* 89:2339-2345.
- 554 Wong BY, Coulter DA, Choi DW, Prince DA. 1988. Dextrorphan and dextromethorphan,  
555 common antitussives, are antiepileptic and antagonize N-methyl-D-aspartate in brain slices.  
556 *Neuroscience letters.* 85:261-266.
- 557 Ziemann U, Bruns D, Paulus W. 1996. Enhancement of human motor cortex inhibition by the  
558 dopamine receptor agonist pergolide: evidence from transcranial magnetic stimulation.  
559 *Neuroscience letters.* 208:187-190.
- 560 Ziemann U, Chen R, Cohen LG, Hallett M. 1998. Dextromethorphan decreases the excitability  
561 of the human motor cortex. *Neurology.* 51:1320-1324.
- 562 Ziemann U, Reis J, Schwenkreis P, Rosanova M, Strafella A, Badawy R, Müller-Dahlhaus F.  
563 2015. TMS and drugs revisited 2014. *Clin Neurophysiol.* 126:1847-1868.
